# Supplementary material
Source: MDPI journal article supplement (https://www.mdpi.com/2076-3417/13/19/10710)
Supplement: s1 [file s1 › applsci-2444085-supplementary.pdf]

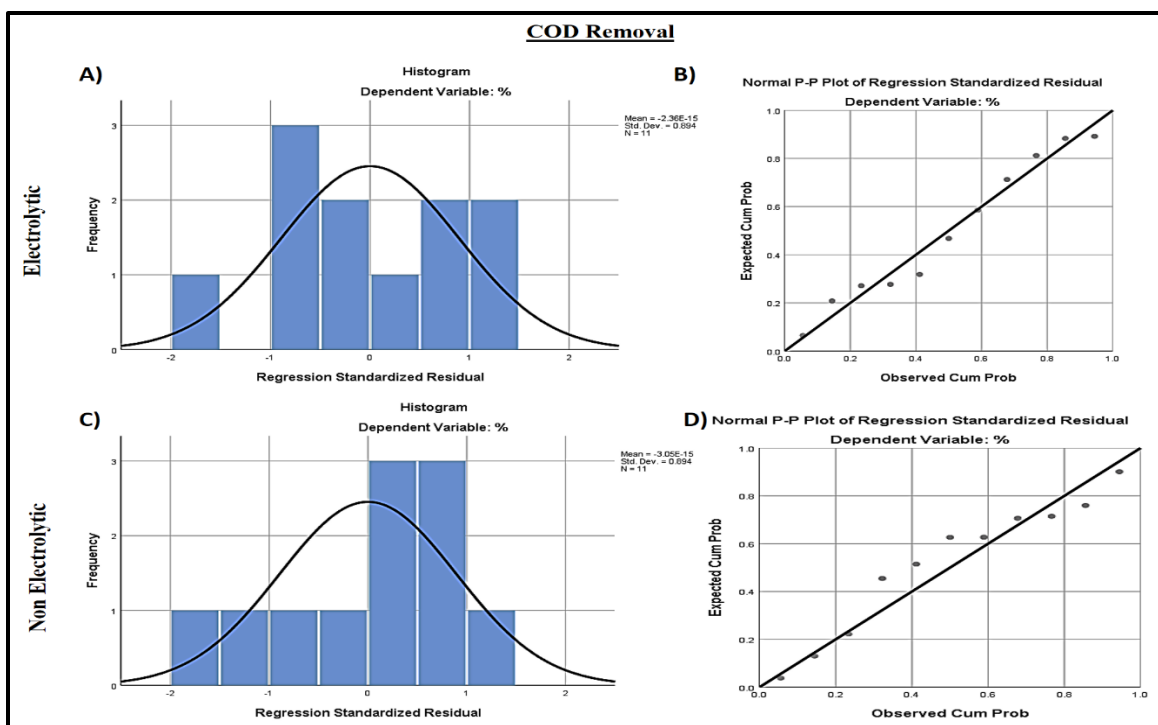

**Figure S1.** Electrolytic and non-electrolytic FFCs treatment performance of COD.

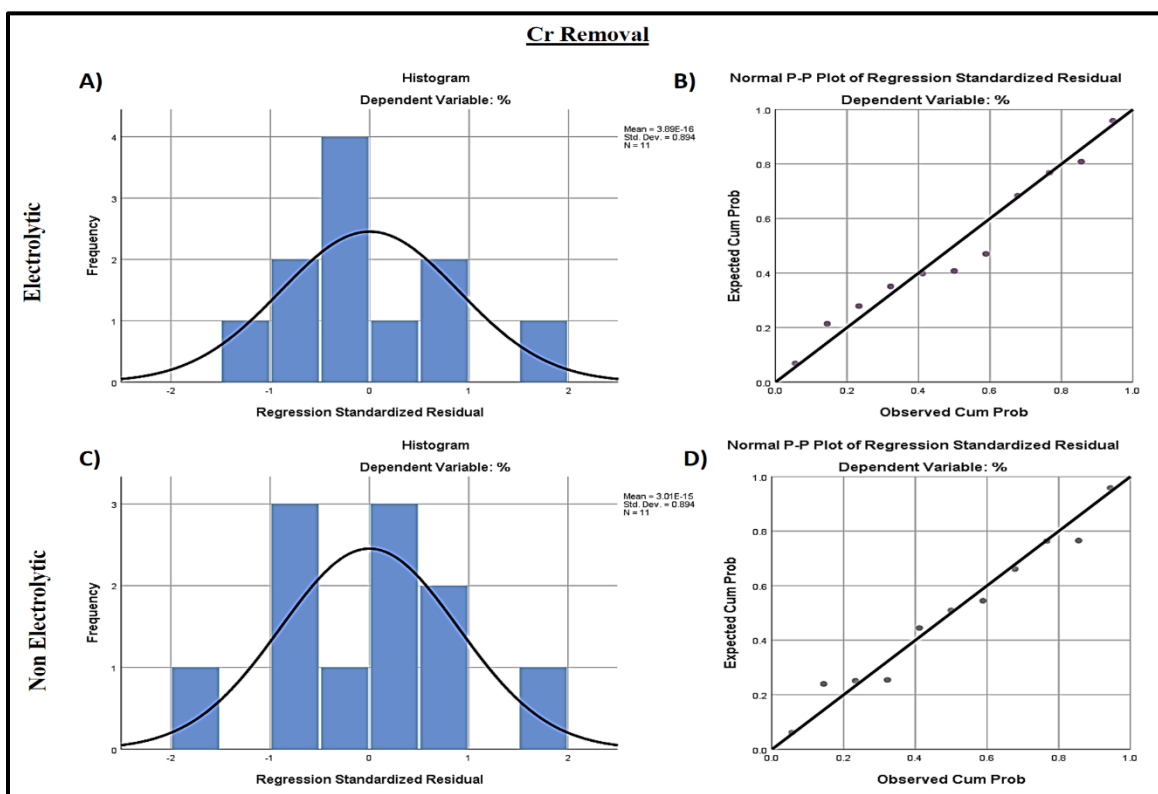

**Figure S2.** Electrolytic and non-electrolytic FFCs treatment performance of Cr.

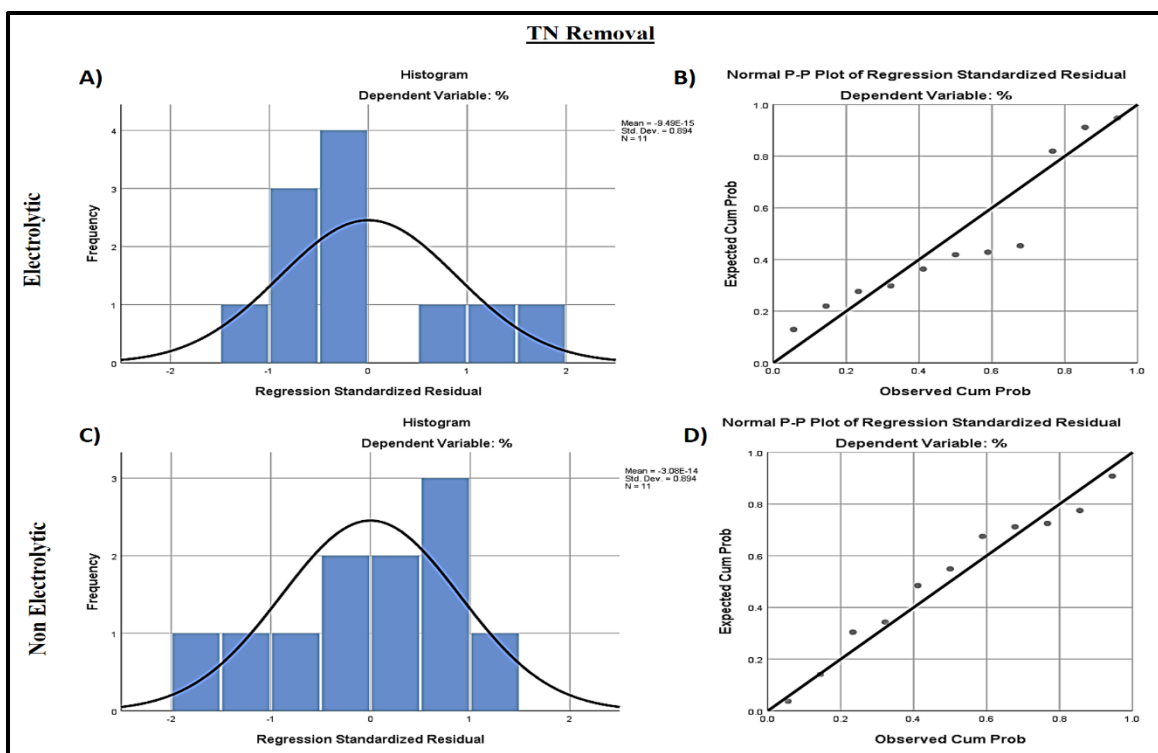

**Figure S3.** Electrolytic and non-electrolytic FFCs treatment performance of TN.
